# Supplementary material for: Quantification of the Forgiveness of Drugs to Imperfect Adherence
Source: PubMed Central journal article supplement — CPT Pharmacometrics Syst Pharmacol. 2015 Mar 4;4(3):e00004. doi: 10.1002/psp4.4 (PMC4394614; doi:10.1002/psp4.4), 2015-03-04
Supplement: psp40004-e00004-sd14.pdf [file psp40004-e00004-sd14.pdf]

# LICENSE TO PUBLISH - OPEN ACCESS

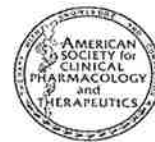

Manuscript Number:

PSP-2014-0084

Journal Name:

CPT: Pharmacometrics & Systems Pharmacology

(the "Journal")

Proposed Title of the Contribution:

Quantification of the forgiveness of drugs to imperfect adherence

(the "Contribution")

Author(s):

Piyanan Assawasuwannakit, Rhiannon Braund, Stephen B Duffull

(the "Author(s)")

American Society for Clinical Pharmacology and Therapeutics (the "Society") will consider publishing the Contribution pursuant to the terms set forth herein, including granting readers rights to use the Contribution on an open access basis selected below. The "Contribution" is defined as the text content of the paper named above and all supplementary information such as but not limited to tables, graphs and images.

In order for the Society to consider publishing the Contribution, Author(s) please:

1. read and complete the Article Processing Charge (APC) Payment Form which forms part of this contract;
2. read the terms, and select below one of the Creative Commons licenses for which the Society will make the Contribution available to readers on an open access basis; and
3. read the rest of this License to Publish and confirm acceptance of this Agreement by completing the required fields below.

CC BY\*:

This license allows readers to copy, distribute and transmit the Contribution as long as it is attributed back to the author. Readers are permitted to alter, transform or build upon the Contribution, and to use the article for commercial purposes. Please read the full legal code for further details at - <http://creativecommons.org/licenses/by/3.0/>

CC BY-NC-SA:

This license allows readers to copy, distribute and transmit the Contribution as long as it is attributed back to the author. Readers are permitted to alter, transform or build upon the Contribution as long as the resulting work is then distributed under this or a similar license. Readers are not permitted to use the Contribution for commercial purposes. Please read the full legal code for further details at - <http://creativecommons.org/licenses/by-nc-sa/3.0/>

CC BY-NC-ND:

This license allows readers to copy, distribute and transmit the Contribution as long as it is attributed back to the author. Readers may not alter, transform or build upon the Contribution, or use the article for commercial purposes. Please read the full legal code for further details at - <http://creativecommons.org/licenses/by-nc-nd/3.0/>

\*This license type may attract a premium-priced APC. Please note that some funding bodies (for example, Wellcome Trust, RCUK) may require that you select this license type.

## LICENSE TO PUBLISH TERMS

1. In consideration of the Society evaluating the Contribution for publication (and publishing the Contribution if the Society so decides) the Author(s) grant to the Society for the full term of copyright and any extensions thereto, subject to clause 2 below, the right and irrevocable license:
  - (a) to edit, adapt, publish, reproduce, distribute, display and store the Contribution in all forms, formats and media whether now known or hereafter developed (including without limitation in print, digital and electronic form) throughout the world;
  - (b) to translate the Contribution into other languages, create adaptations, summaries or extracts of the Contribution or other derivative works based on the Contribution and exercise all of the rights set forth in (a) above in such translations, adaptations, summaries, extracts and derivative works;
  - (c) to license others to do any or all of the above, including but not limited to the right to grant readers the right to use the Contribution under the Creative Commons license selected above; and
  - (d) to re-license article metadata without restriction (including but not limited to author name, title, abstract, citation, references, keywords and any additional information, as determined by the Society).
2. Ownership of the copyright in the Contribution remains with the Author(s). However, the Author(s)' re-use rights in the Contribution are subject to the rights and restrictions set forth below in this Section, and in clauses 3 and 4(a). After the Author(s) have submitted the Contribution to the Society hereunder, the Author(s)' rights to re-use the Contribution shall be the same as those set forth in the Creative Commons license selected above, with the following additional re-use rights:
  - (a) to reproduce the Contribution in whole or in part in any printed volume (book or thesis) of which they are the Author(s); and
  - (b) to reuse figures or tables created by the Author(s) and contained in the Contribution in oral presentations and other works created by them. Notwithstanding, if the entire Contribution is rejected by the Society and not published, all rights under this license shall revert to the Author(s).
3. The Society acknowledges that an earlier version of the Contribution may have been submitted to a pre-print service (in accordance with that service's standard license terms).
4. The Author(s) jointly and severally warrant and represent to the Society and Nature America, Inc. trading as Nature Publishing Group ("NPG") that:
  - (a) the Author(s) are the sole Author(s) of and sole owners of the copyright in the Contribution and the Contribution is the original work of the Author(s) and not copied (in whole or part) from another work. If however the Contribution includes materials from other sources, the Author(s) warrant they have obtained the permission of the owners of the copyright in all such materials to enable them to grant the rights contained herein. Copies of all such permissions are attached to this license;
  - (b) all of the facts contained in the Contribution are true and accurate;
  - (c) the signatory (the Author or the employer) who has signed this Agreement below has full right, power and authority to enter into this Agreement and grant the rights herein on behalf of all of the Authors;
  - (d) nothing in the Contribution is obscene, defamatory, libelous, violates any right of privacy or publicity, infringes any intellectual property rights (including without limitation copyright, patent, database or trademark rights) or any other human, personal or other rights of any person or entity or is otherwise unlawful; and
  - (e) nothing in the Contribution infringes any duty of confidentiality which any of the Author(s) may owe to anyone else or violates any contract, express or implied, of any of the Author(s), and all of the institutions in which work recorded in the Contribution was created or carried out, have authorized such publication.
5. The Author(s) authorize the Society to take such steps as it considers necessary at its own expense in the Author(s) name and on their behalf if the Society believes that a third party is infringing or is likely to infringe copyright in the Contribution including but not limited to initiating legal proceedings.
6. The Author(s) hereby waive or agree not to assert (where such waiver is not possible at law) any and all moral rights they may now or in the future hold in connection with the Contribution.
7. The Author(s) shall cooperate fully with the Society in relation to any legal action that might arise from the publication of the Contribution and the Author(s) shall give the Society access at reasonable times to any relevant accounts, documents and records within the power or control of the Author(s).
8. The Author(s) agree that NPG is intended to have the benefit of and shall have the right to enforce the terms of this Agreement.
9. This Agreement shall be governed by the laws of the State of New York, without regard to any conflict of law provisions. The parties submit to the exclusive jurisdiction of the courts located in New York, New York.

Signed for and on behalf of the Author(s):

Piyanan

Print name:

Piyanan Assawasuwannakit

Date:

8/10/2014

Address:

School of Pharmacy, University of Otago  
PO Box 56,  
Dunedin 9054, New Zealand
